# Supplementary material for: Insect Herbivory Strongly Modifies Mountain Birch Volatile Emissions
Source: Front Plant Sci. 2020 Oct 27;11:558979. doi: 10.3389/fpls.2020.558979 (PMC7652793; doi:10.3389/fpls.2020.558979)
Supplement: Supplementary file 2 [file Data_Sheet_2.xlsx]

## Sheet: Table S1
Table S1 Environmental parameters recorded during measuremments for all three experiments Abisko-1, Abisko-2, Tromsø:larval density, mean temperature in the measurement bag (°C), mean ambient temperature (°C), mean relative humidity in the measurement bag (%), mean ambient relative humidity (%), photosynthetically active radiation 1m above ground (μmol m−2 s−1).
Experiment	Larval density	Mean temperature in the measurement bag (°C)		Mean ambient temperature (°C)		Mean relative humidity in the measurement bag (%)		Mean ambient relative humidity (%)		Photosynthetically active radiation 1m above ground (μmol m−2 s−1)
		mean	SE	mean	SE	mean	SE	mean	SE	mean	SE
Abisko-1	0	12.51	0.53	10.6	0.53	77.39	2.36	57.54	2.6	400.87	2.6
	5	12.47	0.61	10.47	0.47	78.2	1.65	57.25	2.32	409.28	2.32
	15	11.86	0.43	10.78	0.6	77.26	3.04	56.71	2.75	370.84	2.75
	30	12.8	0.38	10.53	0.49	77.72	1.28	57.87	2.23	359.39	2.23
	50	12.61	0.62	10.42	0.4	73.85	3.55	58.42	2.06	384.59	2.06
Abisko-2	0	12.51	0.36	11.06	0.47	86.94	1.3	87.82	1.3	132.84	1.3
	5	12.41	0.56	11.06	0.47	84.92	1.07	87.82	1.3	132.84	1.29
	15	12.3	0.56	11.08	0.28	85.36	1.85	88.03	1.04	118.35	1.04
	30	12.36	0.51	11.07	0.27	86.58	0.82	88.66	1.05	118.34	1.05
	50	11.9	0.43	10.5	0.4	83.69	1.75	83.77	5	161.25	5
Tromsø	0	8.65	0.84	6.6	0.6	89.71	2.93	78.62	3.41	429.96	59.54
	5	8.58	0.94	6.6	0.6	89.87	5.64	78.62	3.41	429.96	59.54
	15	8.39	0.81	6.6	0.6	90.54	3.43	78.62	3.41	429.96	59.54
	30	8.7	0.73	6.6	0.6	89.64	3.92	78.62	3.41	429.96	59.54

## Sheet: Table S2
Table S2 Mean (ng cm-2 leaf area h-1) and SE for BVOC emissions for every compound in each compound group for every experiment. Compounds are arranged in descending order, with most abundant compound (bold) being first. Volatile compounds identified with standards are marked with *, the rest are identified with NIST 14 library.
		Compound	Mean	SE
Abisko-1	Benzenoids	Benzaldehyde*	0.102391	0.0118896
		Acetophenone	0.0354914	0.00563465
		Phenylmaleic anhydride	0.0193488	0.0059107
		Phenol	0.0190179	0.00307724
		2-Phenylbutenolide	0.0133984	0.00345972
		1,2-Benzenedicarboxylic acid	0.00934993	0.0019477
		2-Phenoxy-ethanol	0.00911262	0.00183884
		Toluene*	0.00745098	0.0014682
		Benzophenone	0.0023245	0.000371816
		α-Methylstyrene	0.00132076	0.000346521
	GLV	(E)-2-Hexenal*	0.634708	0.177892
		(Z)-3-Hexenyl acetate*	0.257388	0.0514252
		(Z)-3-Hexenol*	0.209277	0.0356878
		Hexanal*	0.142386	0.0244374
		(E,E)-2,4-Hexadienal	0.130948	0.0316677
		3-Hexenal	0.0785832	0.0250706
		(Z)-Hexenyl isovalerate	0.0253735	0.00586619
		(Z)-3-Hexenyl butyrate*	0.0132142	0.0029719
		4-Methyl-1,3-pentadiene	0.0120465	2.81864
	HT	(E)-4,8-Dimethylnona-1,3,7-triene	0.0526707	0.0128019
	MT	Linalool*	0.0636744	0.0147993
		(E)-β-Ocimene*	0.0380419	0.0139174
		Myrcene*	0.0107444	0.00202064
		α-Pinene*	0.00299555	0.000679704
	Other	Tetracosane	0.153808	0.0313802
		Nonanal*	0.152158	0.0199235
		3-Methylhexane	0.143527	0.0429227
		5-Ethyl-2(5H)-furanone	0.072622	0.0200033
		Octanal*	0.0494536	0.00547415
		1-Octene*	0.0468512	0.0059004
		1-(Dimethylamino)-2-propanone	0.0362361	0.00344437
		Benzenesulfonamide, N-butyl-	0.0331247	0.00421877
		2-Butanone	0.0301658	0.00449806
		Heptanal	0.0134973	0.00149173
		Undecanal	0.0119094	0.00118326
		Furfural*	0.00797213	0.00169884
		4,8,8-Trimethyl-2-methylene-bicyclo[5.2.0]nonane	0.00733866	0.00153552
		Butyrolactone	0.00512217	0.00069605
		Methyl 2-methylbutyrate	0.00018243	1.57041e-05
		Methyl butyrate	0.000167199	2.19268e-05
	SQT	(Z)-β-Farnesene*	0.0242174	0.00492849
		(E)-β-Caryophyllene*	0.0117169	0.00175861
		α-Bourbonene	0.00858464	0.00305728
		α-Humulene*	0.00277468	0.000393356
		4a,5-Dimethyl-3-(prop-1-en-2-yl)-1,2,3,4,4a,5,6,7-octahydronaphthalen-1-ol	0.0020256	0.000819142
		Aromandendrene*	0.00135724	0.000152552
		Caryophyllene oxide	0.00116392	0.000217953
		β-Copaene	0.000872678	0.00023137
Abisko-2	Benzenoids	Methyl salicylate*	0.130604	0.0315347
		Benzene	0.0928707	0.0282663
		Methyl benzoate	0.0579309	0.0143733
		(Z)-3-Hexenyl benzoate	0.0456042	0.0163924
		Benzyl nitrile	0.0362284	0.00939332
		Indole	0.0267248	0.0086999
		Phenylmaleic anhydride	0.0232183	0.00573011
		Acetophenone	0.0185314	0.00685318
		p-Xylene*	0.0144516	0.00523404
		Benzonitrile	0.0133836	0.00414771
		Toluene*	0.0075317	0.00228765
		2-Methoxytoluene	0.00574776	0.00183644
		p-Cymenene	0.00467212	0.00111753
		3-Methoxyacetophenone	0.00358652	0.00240761
		Benzophenone	0.00285347	0.000814575
		1,3-Dimethyl-benzene	0.0026953	0.000747144
		Benzaldehyde dimethyl acetal	0.00115322	0.000165177
	GLV	(E)-2-Hexenal*	0.676649	0.354796
		(Z,Z)-2,4-Hexadiene	0.537974	0.133733
		(Z)-3-Hexenyl acetate*	0.411205	0.0814553
		(Z)-3-Hexenol*	0.253689	0.0446351
		(Z)-2-Hexenol	0.1256	0.0505787
		(E)-4-Oxohex-2-enal	0.124273	0.0883419
		(E,E)-2,4-Hexadienal	0.121097	0.0514833
		3-Hexenal	0.0870612	0.0829357
		(Z)-2-Hexenyl acetate	0.0737089	0.0367051
		(Z)-3-Hexenyl butyrate*	0.0643503	0.0229679
		Hexanal	0.0560238	0.0372299
		Unidentified GLV	0.0314515	0.0164629
		Hexyl acetate	0.0178815	0.00480443
		(E)-2-Pentenal	0.00505972	0.00227098
		3-Pentanone	0.00267967	0.00158726
	HT	(E)-4,8-Dimethylnona-1,3,7-triene	0.277799	0.0743619
	MT	(E)-β-Ocimene*	0.992285	0.397592
		α-Pinene*	0.439509	0.183103
		Linalool*	0.360511	0.132849
		Myrcene*	0.197194	0.0540222
		(Z)-Ocimene	0.126925	0.0390212
		Terpinolene*	0.11042	0.0317028
		Limonene*	0.0375285	0.00941686
		Eucalyptol*	0.0237776	0.0180964
		Unidentified monoterpene	0.0235423	0.00622413
		(Z)-Linalool oxide	0.0162336	0.00680463
		p-Cymene*	0.00613465	0.00174055
	Other	Decanal	0.335421	0.0946727
		Cyclohexane, 2-ethenyl-1,1-dimethyl-3-	0.29772	0.0675615
		2-Methyl-butane	0.233813	0.0356503
		6-Methyl-5-hepten-2-one	0.223522	0.0806478
		Hexacosane	0.198931	0.0461117
		1-Octene*	0.116323	0.0380789
		Nonanal*	0.0872116	0.0336573
		2-Butanone	0.0856584	0.023299
		4-Methyl-2-methylene-1-(1methylethylidene)-cyclohexane	0.0771211	0.0241214
		N-Butyl-benzenesulfonamide	0.0723942	0.0102778
		3,3,5-Trimethyl-cyclohexene	0.0500086	0.0128964
		1,6,6-Trimethyl-cyclohexene	0.0482624	0.0139099
		2-Cyclopropylidene-1,7,7-trimethylbicyclo[2.2.1]heptane	0.0328736	0.00567865
		Heptane	0.031813	0.0100713
		3,3-Dimethyl-pentane	0.0313541	0.00923468
		1,3-Pentadiene	0.0280888	0.00643915
		(E)-4,4-Dimethyl-2-pentene	0.0208114	0.00828491
		Methyl isobutyl ketone	0.0195908	0.00681435
		Undecanal	0.0164821	0.00708607
		Megastigma-4,6(E),8(E)-triene	0.011906	0.0018628
		Hexadecane	0.0113098	0.00413046
		2,4,4-Trimethyl-1-pentene	0.0100255	0.00316496
		1,8-Cyclopentadecadiyne	0.00993246	0.00233555
		Bicylo[4.1.0]heptane, 7-bicyclo[4.1.0]hept-7-ylidene-	0.00854589	0.00156812
		2-Methyl-furan*	0.00826991	0.00127335
		(Z)-Geranylacetone	0.00726514	0.00181325
		Furfural*	0.00696045	0.00257139
		11,11-Dimethyl-spiro[2,9]dodeca-3,7-dien	0.00532261	0.0010752
		Tetrahydro-2-pyranone	0.0048724	0.00100857
		4-Hydroxybutanoic acid	0.00257544	0.00125103
		2,2-Dihydroxy-1-phenylethanone	0.00124385	0.000324571
	SQT	(Z)-β-Farnesene*	0.110523	0.0234819
		(E)-β-Caryophyllene*	0.0582355	0.0118865
		α-Bourbonene	0.0436185	0.0141136
		α-Humulene*	0.01426	0.00242545
		Germacene D	0.0141246	0.00275401
		α-Muurolene	0.0105344	0.00263388
		1R,3Z,9s-4,11,11-Trimethyl-8-methylenebicyclo[7.2.0]undec-3-ene	0.010169	0.00216485
		Caryophyllene oxide	0.00772596	0.00110216
		α-Copaene	0.00620838	0.00157881
		α-Cadinene	0.00609426	0.00223991
		α-Cubebene	0.00514933	0.00192661
		α-Farnesene	0.00471308	0.00200853
		β-Copaene	0.00372773	0.00194779
		(1R,3E,7E,11R)-1,5,5,8-Tetramethyl-12-oxabicyclo[9.1.0]dodeca-3,7-diene	0.000348709	3.51393e-05
Tromsø	Benzenoids	Phenylmaleic anhydride	0.189732	0.10298
		1,2-Benzenedicarboxylic acid	0.125034	0.0786534
		Benzaldehyde*	0.0855859	0.0246085
		Acetophenone	0.0360581	0.0153022
		Benzophenone	0.0304125	0.015506
		Toluene*	0.0217346	0.00441115
		Phenol	0.0217246	0.008291
		Benzene	0.0208231	0.00686176
		Cyclohexylbenzene	0.0115154	0.00503447
		p-Xylene*	0.00604927	0.00161031
		4-Phenyl-4-cyclopentene-1,3-dione	0.00434755	0.00210584
		Methyl salicylate*	0.00405793	0.00132498
		Indole	0.00387512	0.00137588
		1,3-Dimethyl-benzene	0.00318758	0.000960084
		α-Methylstyrene	0.00163676	0.000555844
		Benzaldehyde dimethyl acetal	0.000519182	0.000167723
	GLV	(E)-2-Hexenal*	0.991841	0.293889
		3-Hexenal	0.328671	0.129671
		Hexanal	0.223016	0.0587422
		(Z)-3-Hexenyl acetate*	0.183832	0.0502508
		1-Penten-3-one	0.153003	0.0464849
		(Z)-3-Hexenol*	0.146382	0.0401938
		(Z)-2-Hexenol	0.14169	0.0467678
		1-Hexanol	0.0911237	0.0236258
		(E)-2-Penten-1-ol	0.0872227	0.0213633
		(E,E)-2,4-Hexadienal	0.0800786	0.0250328
		(Z)-2-Hexenyl acetate	0.0761643	0.028939
		(E)-2-Pentenal	0.0486277	0.0172639
		(Z)-3-Hexenyl butyrate*	0.0349916	0.0151084
		3-Pentanone	0.0323655	0.00617523
		(Z)-2-Hexenyl butyrate	0.0338337	0.0104942
		Hexyl acetate	0.0214564	0.00594261
		(E)-2-Methyl-1,3-pentadiene	0.0160576	0.00369598
		(Z)-3-Hexenyl 2-methylbutanoate	0.006506	0.00236969
	HT	(E)-4,8-Dimethylnona-1,3,7-triene	0.055952	0.0150504
	MT	Linalool*	0.0578785	0.0140525
		α-Pinene*	0.0872744	0.0407765
		(E)-β-Ocimene*	0.0330719	0.00796542
		β-Pinene	0.00603072	0.000834981
	Other	Decanal	0.211078	0.0602802
		Nonanal*	0.177488	0.0359224
		1,1-Dimethyl-3-methylene-2-vinylcyclohexane	0.134989	0.0340948
		2-Cyclopropylidene-1,7,7-trimethylbicyclo[2.2.1]heptane	0.105522	0.0254844
		Cyclobutane	0.0907969	0.0167911
		6-Methyl-5-hepten-2-one	0.0663984	0.0299559
		1-Nonene	0.0411763	0.0105129
		Octanal*	0.0361643	0.00967505
		4,8,8-Trimethyl-2-methylene-bicyclo[5.2.0]nonane	0.0346316	0.00671149
		2-Butanone	0.0335473	0.00576178
		Propylene oxide	0.031674	0.00629375
		1-Octene*	0.0312811	0.00717175
		Khusimyl methyl ether	0.0208143	0.004316
		2-methyl-Furan*	0.0195609	0.00213898
		1,8-Cyclopentadecadiyne	0.0146325	0.00326269
		Maleic anhydride	0.0127026	0.0072582
		Benzofuran	0.0111857	0.00624248
		2-ethyl-furan	0.010997	0.00265888
		Furfural*	0.00972749	0.00176119
		Megastigma-4,6(E),8(E)-triene	0.00944665	0.00215025
		p-Benzoquinone	0.00733778	0.00387995
		2,3-Dihydro-4-methylfuran	0.00616124	0.00147056
		Ethylidenecyclopropane	0.004945	0.000708915
		Methyl isobutyl ketone	0.00260369	0.000627849
		2-Methyl-1-butanol	0.00214397	0.0003277
		β-Methoxy-(S)-2-furanethanol	0.00117312	0.00033956
		Methyl butyrate	0.000556798	0.00012642
		Methyl propionate	0.000145971	8.09663e-05
	SQT	(E)-β-Caryophyllene*	1.42309	0.288626
		Aromandendrene*	0.611856	0.122488
		α-Humulene*	0.244147	0.0591163
		Caryophyllene oxide	0.114213	0.0359663
		Isocaryophyllene	0.0549921	0.0171367
		Isovalencenol	0.0507568	0.0096197
		Eudesma-1,4(15),11-triene	0.038023	0.015042
		α-Copaene	0.0368422	0.00756826
		Aciphyllene	0.0246282	0.00500053
		α-Bourbonene	0.0244856	0.00550162
		(1R,7S,E)-7-Isopropyl-4,10-dimethylenecyclodec-5-enol	0.0138586	0.00299388
		1R,3Z,9s-4,11,11-Trimethyl-8-methylenebicyclo[7.2.0]undec-3-ene	0.00690963	0.00108382
		β-Selinene	0.00604839	0.000993667
		β-copaene	0.00533833	0.00150784
		α-Longipinene	0.00501258	0.00148703
		Cadine-1,4-diene	0.00458802	0.000884086
		Chamigrene	0.00346728	0.000638975
		β-Cubebene	0.00124775	0.000457295

## Sheet: Table S3
Table S3 Summary of mixed effects models testing for the relationship between insect density and the emission rates of BVOCs for each compound group and in total. Log(x+1) transformation was applied to all BVOC data to adjust for the rightward skew prior to linear mixed-effects model analyses. Block was treated as random factor. The table shows F-statistics (F) and P-values (P), parameter estimat…
Experiment	Compound class	Larval density	F	p ,model	Estimate	SE	P value
Abisko-1	MT	0	5.59828	0.0089	0.0147362	0.0382705	0.7069
		5			0.0141518	0.0500962	0.7824
		15			0.0902789	0.0500962	0.0967
		30			0.147444	0.0500962	0.0123
		50			0.194637	0.0500962	0.0022
	HT	0	13.9067	0.0002	0.00096793	0.0157167	0.9519
		5			0.00656501	0.0187094	0.7318
		15			0.0491084	0.0187094	0.0222
		30			0.120779	0.0187094	0
		50			0.0685402	0.0187094	0.0032
	SQT	0	5.58039	0.009	0.0270115	0.01565	0.11
		5			-0.00268547	0.0164766	0.8732
		15			0.0174885	0.0164766	0.3094
		30			0.0429216	0.0164766	0.023
		50			0.0606319	0.0164766	0.0031
	GLV	0	42.44	<.0001	0.140913	0.109396	0.222
		5			0.0715309	0.123749	0.5739
		15			0.972463	0.123749	0
		30			0.809351	0.123749	0
		50			1.29442	0.123749	0
	Benzenoid	0	0.21	0.93	0.173218	0.0596451	0.0132
		5			0.0220254	0.0716218	0.7637
		15			-0.00258887	0.0716218	0.9718
		30			0.0218687	0.0716218	0.7653
		50			0.0552994	0.0716218	0.455
	Other	0	6.82	0.004	0.450661	0.0801381	0.0001
		5			-0.144546	0.100426	0.1756
		15			0.354973	0.100426	0.0041
		30			0.102995	0.100426	0.3253
		50			0.154226	0.100426	0.1505
	Total	0	60.39	<.0001	0.65	0.100594	0
		5			-0.04	0.093441	0.68
		15			0.88	0.093441	0
		30			0.72	0.093441	0
		50			1.08	0.093441	0
Abisko-2	MT	0	6.74641	0.0044	0.0624168	0.285658	0.8307
		5			0.335259	0.3429	0.3475
		15			0.846451	0.3429	0.0296
		30			1.2508	0.3429	0.0033
		50			1.52491	0.3429	0.0008
	HT	0	7.93008	0.0023	0.0027147	0.0800647	0.9735
		5			0.0787522	0.101004	0.4507
		15			0.145816	0.101004	0.1744
		30			0.377359	0.101004	0.0028
		50			0.471648	0.101004	0.0005
	SQT	0	5.97472	0.007	0.113727	0.0637713	0.0998
		5			-0.0110993	0.0896748	0.9035
		15			0.0941372	0.0896748	0.3145
		30			0.201573	0.0896748	0.0442
		50			0.359957	0.0896748	0.0017
	GLV	0	6.64	0.0046	0.617954	0.282516	0.0492
		5			-0.249031	0.292789	0.4117
		15			0.324787	0.292789	0.289
		30			0.571014	0.292789	0.0749
		50			1.13017	0.292789	0.0023
	Benzenoid	0	2.06	0.15	0.243006	0.0997669	0.0314
		5			-0.0280507	0.132524	0.8359
		15			0.191356	0.132524	0.1744
		30			0.233592	0.132524	0.1034
		50			0.255851	0.132524	0.0775
	Other	0	3.43	0.04	0.770658	0.160853	0.0004
		5			0.0803455	0.22748	0.7301
		15			0.258184	0.22748	0.2785
		30			0.703404	0.22748	0.0093
		50			0.530111	0.22748	0.038
	Total	0	7.83	0.0024	1.26514	0.273647	0.0006
		5			0.015182	0.325405	0.9636
		15			0.661613	0.325405	0.0648
		30			1.11279	0.325405	0.0051
		50			1.43588	0.325405	0.0008
Tromsø	MT	0	2.25967	0.1338	0.0422189	0.0579671	0.4804
		5			0.0908663	0.0819779	0.2894
		15			0.201599	0.0819779	0.0301
		30			0.15396	0.0819779	0.0849
	HT	0	8.66382	0.0025	0.0126497	0.0186767	0.5111
		5			0.00070367	0.0260445	0.9789
		15			0.0438962	0.0260445	0.1177
		30			0.115205	0.0260445	0.0008
	SQT	0	0.441645	0.7275	1.2625	0.280752	0.0007
		5			-0.302062	0.28104	0.3036
		15			-0.0557612	0.28104	0.846
		30			-0.148765	0.28104	0.6062
	GLV	0	26.44	<.0001	0.213395	0.175265	0.2468
		5			0.282143	0.221247	0.2264
		15			0.893357	0.221247	0.0016
		30			1.81739	0.221247	0
	Benzenoid	0	0.84	0.49	0.118204	0.220343	0.6014
		5			0.217624	0.204169	0.3074
		15			0.283117	0.204169	0.1908
		30			0.27534	0.204169	0.2024
	Other	0	2.68	0.09	0.687306	0.141586	0.0004
		5			-0.169808	0.16323	0.3187
		15			0.0697253	0.16323	0.6768
		30			0.286306	0.16323	0.1049
	Total	0	5.16	0.016	1.6158	0.249969	0
		5			-0.0850368	0.285474	0.7709
		15			0.406971	0.285474	0.1795
		30			0.917771	0.285474	0.0074

## Sheet: Table S4
Table S4 Summary table of multiple Comparisons of Means among different densities presented as Tukey Contrasts for each of three experiments (Abisko-1, Abisko-2, Tromsø) for each of the compound groups and total BVOCs. The table shows parameter estimates, standart error (SE), z value, P-value (adjusted for multiple comparisons), lower and upper limits of the 95% confidence intervals (CI) of the f…
Abisko-1
Larval density			Estimate	SE	z value	P(>|z|)	lwr	upr
Total
5	-	0	-0.03886	0.08152	-0.477	0.989	-0.26123	0.18351
15	-	0	0.88681	0.08152	10.878	<0.001	0.66444	1.10918
30	-	0	0.7218	0.08152	8.854	<0.001	0.49942	0.94417
50	-	0	1.07933	0.08152	13.24	<0.001	0.85696	1.3017
15	-	5	0.92567	0.08152	11.355	<0.001	0.7033	1.14804
30	-	5	0.76066	0.08152	9.33	<0.001	0.53829	0.98303
50	-	5	1.1182	0.08152	13.716	<0.001	0.89582	1.34057
30	-	15	-0.16501	0.08152	-2.024	0.254	-0.38739	0.05736
50	-	15	0.19252	0.08152	2.362	0.126	-0.02985	0.4149
50	-	30	0.35754	0.08152	4.386	<0.001	0.13517	0.57991
MT
5	-	0	0.01415	0.04338	0.326	0.99756	-0.10425	0.13255
15	-	0	0.09028	0.04338	2.081	0.2283	-0.02812	0.20868
30	-	0	0.14744	0.04338	3.399	0.00628	0.02905	0.26584
50	-	0	0.19464	0.04338	4.486	< 0.001	0.07624	0.31303
15	-	5	0.07613	0.04338	1.755	0.40037	-0.04227	0.19452
30	-	5	0.13329	0.04338	3.072	0.01818	0.01489	0.25169
50	-	5	0.18049	0.04338	4.16	< 0.001	0.06209	0.29888
30	-	15	0.05716	0.04338	1.318	0.68023	-0.06123	0.17556
50	-	15	0.10436	0.04338	2.405	0.11375	-0.01404	0.22276
50	-	30	0.04719	0.04338	1.088	0.81294	-0.0712	0.16559
HT
5	-	0	0.006565	0.016203	0.405	0.99434	-0.03763	0.05076
15	-	0	0.049108	0.016203	3.031	0.0207	0.004913	0.093304
30	-	0	0.120779	0.016203	7.454	< 0.001	0.076584	0.164974
50	-	0	0.06854	0.016203	4.23	< 0.001	0.024345	0.112735
15	-	5	0.042543	0.016203	2.626	0.06591	-0.001652	0.086739
30	-	5	0.114214	0.016203	7.049	< 0.001	0.070019	0.158409
50	-	5	0.061975	0.016203	3.825	0.00122	0.01778	0.10617
30	-	15	0.071671	0.016203	4.423	< 0.001	0.027476	0.115866
50	-	15	0.019432	0.016203	1.199	0.75183	-0.024763	0.063627
50	-	30	-0.052239	0.016203	-3.224	0.01106	-0.096434	-0.008044
SQT
5	-	0	-0.002685	0.014269	-0.188	0.9997	-0.041609	0.036238
15	-	0	0.017488	0.014269	1.226	0.7364	-0.021435	0.056412
30	-	0	0.042922	0.014269	3.008	0.022	0.003998	0.081845
50	-	0	0.060632	0.014269	4.249	<0.001	0.021708	0.099555
15	-	5	0.020174	0.014269	1.414	0.6187	-0.01875	0.059097
30	-	5	0.045607	0.014269	3.196	0.0121	0.006684	0.084531
50	-	5	0.063317	0.014269	4.437	<0.001	0.024394	0.102241
30	-	15	0.025433	0.014269	1.782	0.3839	-0.01349	0.064357
50	-	15	0.043143	0.014269	3.024	0.021	0.00422	0.082067
50	-	30	0.01771	0.014269	1.241	0.7272	-0.021213	0.056634
GLV
5	-	0	0.07153	0.10717	0.667	0.9634	-0.22078	0.36384
15	-	0	0.97246	0.10717	9.074	<0.001	0.68015	1.26478
30	-	0	0.80935	0.10717	7.552	<0.001	0.51704	1.10166
50	-	0	1.29442	0.10717	12.078	<0.001	1.00211	1.58673
15	-	5	0.90093	0.10717	8.407	<0.001	0.60862	1.19324
30	-	5	0.73782	0.10717	6.885	<0.001	0.44551	1.03013
50	-	5	1.22289	0.10717	11.411	<0.001	0.93057	1.5152
30	-	15	-0.16311	0.10717	-1.522	0.548	-0.45543	0.1292
50	-	15	0.32195	0.10717	3.004	0.0223	0.02964	0.61427
50	-	30	0.48507	0.10717	4.526	<0.001	0.19276	0.77738
Benzenoids
5	-	0	0.0220254	0.0620263	0.355	0.997	-0.147206	0.191257
15	-	0	-0.0025889	0.0620263	-0.042	1	-0.17182	0.166642
30	-	0	0.0218687	0.0620263	0.353	0.997	-0.147363	0.1911
50	-	0	0.0552994	0.0620263	0.892	0.9	-0.113932	0.224531
15	-	5	-0.0246142	0.0620263	-0.397	0.995	-0.193846	0.144617
30	-	5	-0.0001566	0.0620263	-0.003	1	-0.169388	0.169075
50	-	5	0.033274	0.0620263	0.536	0.984	-0.135957	0.202505
30	-	15	0.0244576	0.0620263	0.394	0.995	-0.144774	0.193689
50	-	15	0.0578883	0.0620263	0.933	0.884	-0.111343	0.22712
50	-	30	0.0334307	0.0620263	0.539	0.983	-0.135801	0.202662
Other
5	-	0	-0.14455	0.08697	-1.662	0.45772	-0.38184	0.09275
15	-	0	0.35497	0.08697	4.081	< 0.001	0.11767	0.59227
30	-	0	0.10299	0.08697	1.184	0.76049	-0.1343	0.34029
50	-	0	0.15423	0.08697	1.773	0.38925	-0.08307	0.39152
15	-	5	0.49952	0.08697	5.743	< 0.001	0.26222	0.73682
30	-	5	0.24754	0.08697	2.846	0.03597	0.01024	0.48484
50	-	5	0.29877	0.08697	3.435	0.00546	0.06147	0.53607
30	-	15	-0.25198	0.08697	-2.897	0.03097	-0.48928	-0.01468
50	-	15	-0.20075	0.08697	-2.308	0.1421	-0.43805	0.03655
50	-	30	0.05123	0.08697	0.589	0.97675	-0.18607	0.28853
Abisko-2
Total
5	-	0	0.01518	0.28181	0.054	1	-0.753557	0.783921
15	-	0	0.66161	0.28181	2.348	0.13	-0.107126	1.43035
30	-	0	1.11279	0.28181	3.949	<0.001	0.344047	1.88152
50	-	0	1.43588	0.28181	5.095	<0.001	0.667146	2.20462
15	-	5	0.64643	0.28181	2.294	0.1468	-0.122308	1.41517
30	-	5	1.0976	0.28181	3.895	<0.001	0.328865	1.86634
50	-	5	1.4207	0.28181	5.041	<0.001	0.651964	2.18944
30	-	15	0.45117	0.28181	1.601	0.4967	-0.317566	1.21991
50	-	15	0.77427	0.28181	2.748	0.0473	0.005533	1.54301
50	-	30	0.3231	0.28181	1.147	0.7817	-0.445639	1.09184
MT
5	-	0	0.3353	0.297	1.129	0.7912	-0.47472	1.14524
15	-	0	0.8465	0.297	2.85	0.0353	0.03647	1.65643
30	-	0	1.2508	0.297	4.212	<0.001	0.44081	2.06078
50	-	0	1.5249	0.297	5.135	<0.001	0.71493	2.3349
15	-	5	0.5112	0.297	1.721	0.4206	-0.29879	1.32117
30	-	5	0.9155	0.297	3.083	0.0175	0.10555	1.72552
50	-	5	1.1897	0.297	4.006	<0.001	0.37967	1.99964
30	-	15	0.4043	0.297	1.362	0.6524	-0.40564	1.21433
50	-	15	0.6785	0.297	2.285	0.1498	-0.13152	1.48844
50	-	30	0.2741	0.297	0.923	0.8881	-0.53587	1.0841
HT
5	-	0	0.07875	0.08747	0.9	0.89687	-0.159754	0.317258
15	-	0	0.14582	0.08747	1.667	0.45455	-0.092689	0.384322
30	-	0	0.37736	0.08747	4.314	< 0.001	0.138853	0.615865
50	-	0	0.47165	0.08747	5.392	< 0.001	0.233142	0.710153
15	-	5	0.06706	0.08747	0.767	0.94015	-0.171441	0.30557
30	-	5	0.29861	0.08747	3.414	0.00577	0.060101	0.537113
50	-	5	0.3929	0.08747	4.492	< 0.001	0.15439	0.631401
30	-	15	0.23154	0.08747	2.647	0.06223	-0.006963	0.470048
50	-	15	0.32583	0.08747	3.725	0.00181	0.087326	0.564337
50	-	30	0.09429	0.08747	1.078	0.818	-0.144217	0.332794
SQT
5	-	0	-0.0111	0.07766	-0.143	0.99991	-0.222949	0.200751
15	-	0	0.09414	0.07766	1.212	0.74433	-0.117713	0.305987
30	-	0	0.20157	0.07766	2.596	0.07106	-0.010277	0.413423
50	-	0	0.35996	0.07766	4.635	< 0.001	0.148107	0.571807
15	-	5	0.10524	0.07766	1.355	0.65653	-0.106613	0.317086
30	-	5	0.21267	0.07766	2.738	0.04862	0.000822	0.424522
50	-	5	0.37106	0.07766	4.778	< 0.001	0.159207	0.582906
30	-	15	0.10744	0.07766	1.383	0.63839	-0.104415	0.319285
50	-	15	0.26582	0.07766	3.423	0.00559	0.05397	0.47767
50	-	30	0.15838	0.07766	2.039	0.24711	-0.053465	0.370235
GLV
5	-	0	-0.249	0.2536	-0.982	0.8635	-0.9407	0.4427
15	-	0	0.3248	0.2536	1.281	0.703	-0.3669	1.0165
30	-	0	0.571	0.2536	2.252	0.1608	-0.1207	1.2627
50	-	0	1.1302	0.2536	4.457	<0.001	0.4385	1.8219
15	-	5	0.5738	0.2536	2.263	0.157	-0.1179	1.2655
30	-	5	0.82	0.2536	3.234	0.0107	0.1283	1.5118
50	-	5	1.3792	0.2536	5.439	<0.001	0.6875	2.0709
30	-	15	0.2462	0.2536	0.971	0.8683	-0.4455	0.9379
50	-	15	0.8054	0.2536	3.176	0.0131	0.1137	1.4971
50	-	30	0.5592	0.2536	2.205	0.1776	-0.1326	1.25
Benzenoids
5	-	0	-0.02805	0.11477	-0.244	0.9992	-0.34115	0.28505
15	-	0	0.19136	0.11477	1.667	0.4543	-0.12174	0.50446
30	-	0	0.23359	0.11477	2.035	0.249	-0.07951	0.54669
50	-	0	0.25585	0.11477	2.229	0.1688	-0.05725	0.56895
15	-	5	0.21941	0.11477	1.912	0.3109	-0.09369	0.53251
30	-	5	0.26164	0.11477	2.28	0.1514	-0.05146	0.57474
50	-	5	0.2839	0.11477	2.474	0.670139	-0.0292	0.597
30	-	15	0.04224	0.11477	0.368	0.9961	-0.27086	0.35534
50	-	15	0.06449	0.11477	0.562	0.9805	-0.24861	0.37759
50	-	30	0.02226	0.11477	0.194	0.9997	-0.29084	0.33536
Other
5	-	0	0.08035	0.197	0.408	0.9942	-0.457119	0.61781
15	-	0	0.25818	0.197	1.311	0.68465	-0.27928	0.795649
30	-	0	0.7034	0.197	3.571	0.00324	0.165939	1.24087
50	-	0	0.53011	0.197	2.691	0.05527	-0.007354	1.06758
15	-	5	0.17784	0.197	0.903	0.89596	-0.359626	0.715304
30	-	5	0.62306	0.197	3.163	0.01364	0.085593	1.16052
50	-	5	0.44977	0.197	2.283	0.15034	-0.0877	0.98723
30	-	15	0.44522	0.197	2.26	0.15805	-0.092246	0.982684
50	-	15	0.27193	0.197	1.38	0.64034	-0.265539	0.809391
50	-	30	-0.17329	0.197	-0.88	0.9044	-0.710758	0.364172
Tromsø
Total
5	-	0	-0.08504	0.25534	-0.333	0.9873	-0.74078	0.57071
15	-	0	0.40697	0.25534	1.594	0.3821	-0.24878	1.06272
30	-	0	0.91777	0.25534	3.594	0.0018	0.26202	1.57352
15	-	5	0.49201	0.25534	1.927	0.2167	-0.16374	1.14776
30	-	5	1.00281	0.25534	3.927	<0.001	0.34706	1.65856
30	-	15	0.5108	0.25534	2	0.1877	-0.14495	1.16655
MT
5	-	0	0.09087	0.07332	1.239	0.6018	-0.0975	0.27923
15	-	0	0.2016	0.07332	2.749	0.0307	0.01324	0.38996
30	-	0	0.15396	0.07332	2.1	0.153	-0.0344	0.34232
15	-	5	0.11073	0.07332	1.51	0.4313	-0.07763	0.2991
30	-	5	0.06309	0.07332	0.86	0.8252	-0.12527	0.25146
30	-	15	-0.04764	0.07332	-0.65	0.9	-0.236	0.14072
HT
5	-	0	0.0007037	0.0232949	0.03	1	-0.0591613	0.0605686
15	-	0	0.0438962	0.0232949	1.884	0.2347	-0.0159687	0.103761
30	-	0	0.115205	0.0232949	4.946	<0.001	0.0553404	0.17507
15	-	5	0.0431925	0.0232949	1.854	0.248	-0.0166724	0.103057
30	-	5	0.114502	0.0232949	4.915	<0.001	0.0546368	0.174367
30	-	15	0.0713092	0.0232949	3.061	0.0117	0.0114442	0.131174
SQT
5	-	0	-0.30206	0.25137	-1.202	0.626	-0.9477	0.34358
15	-	0	-0.05576	0.25137	-0.222	0.996	-0.7014	0.58988
30	-	0	-0.14876	0.25137	-0.592	0.935	-0.7944	0.49687
15	-	5	0.2463	0.25137	0.98	0.761	-0.39934	0.89194
30	-	5	0.1533	0.25137	0.61	0.929	-0.49234	0.79894
30	-	15	-0.093	0.25137	-0.37	0.983	-0.73864	0.55263
GLV
5	-	0	0.2821	0.1979	1.426	0.4832	-0.2263	0.7906
15	-	0	0.8934	0.1979	4.514	<0.001	0.3849	1.4018
30	-	0	1.8174	0.1979	9.184	<0.001	1.3089	2.3258
15	-	5	0.6112	0.1979	3.089	0.0106	0.1028	1.1197
30	-	5	1.5353	0.1979	7.758	<0.001	1.0268	2.0437
30	-	15	0.924	0.1979	4.669	<0.001	0.4156	1.4325
Benzenoids
5	-	0	0.217624	0.182614	1.192	0.632	-0.251386	0.686635
15	-	0	0.283117	0.182614	1.55	0.407	-0.185893	0.752127
30	-	0	0.27534	0.182614	1.508	0.433	-0.19367	0.74435
15	-	5	0.065493	0.182614	0.359	0.984	-0.403517	0.534503
30	-	5	0.057716	0.182614	0.316	0.989	-0.411294	0.526726
30	-	15	-0.007777	0.182614	-0.043	1	-0.476787	0.461233
Other
5	-	0	-0.16981	0.146	-1.163	0.6502	-0.5449	0.20529
15	-	0	0.06973	0.146	0.478	0.96406	-0.30537	0.44482
30	-	0	0.28631	0.146	1.961	0.20288	-0.08879	0.6614
15	-	5	0.23953	0.146	1.641	0.3557	-0.13556	0.61463
30	-	5	0.45611	0.146	3.124	0.00957	0.08102	0.83121
30	-	15	0.21658	0.146	1.483	0.4475	-0.15852	0.59168

## Sheet: Table S5
Table S5 Summary of linear models testing for the relationship between leaf area eaten (%) and the emission rates (ng cm-2 leaf area h-1) of total BVOCs and each compound group. The table shows F-statistics (F, df1,df2) and P-values (P), parameter estimates (Estimate), standard error (SE) both for the slope and intercept of the models; r2 of the model is also reported. Compound groups: MT (monote…
					Slope			Intercept
Experiment	Compound group	df1	df2	F	Estimate	SE	P	Estimate	SE	P	r2
Abisko-1	MT	1	18	8.3106	0.0242	0.008395	<0.01	0.03216	0.037076	0.39712	0.3159
	HT			4.041	0.008633	0.004295	0.05964	0.022956	0.018968	0.2418	0.1833
	SQT			1.5582	0.004087	0.003274	0.2279	0.038645	0.014461	0.0155	0.07967
	GLV			38.72	0.41	0.0592	<0.001	0.09	0.29	0.76	0.68
	Benzenoids			1.27	0.01	0.01149	0.27	0.18	0.05073	0.002	0.07
	Other			7.51	0.08	0.02955	0.01	0.5	0.12	0.0006	0.29
	Total			46.47	0.53479	0.07849	<0.001	0.87	0.34664	0.0192	0.7206
Abisko-2	MT	1	18	61.591	0.52775	0.06725	<0.001	-0.07247	0.44438	0.872	0.7738
	HT			316.5	0.063389	0.003563	<0.001	0.002009	0.023546	0.933	0.9462
	SQT			21.032	0.035473	0.007735	<0.001	0.1411	0.051114	0.012881	0.5388
	GLV			22.13	0.58	0.12	<0.001	0.05	0.82	0.96	0.52
	Benzenoids			16.38	0.04885	0.01287	<0.001	0.28	0.08	0.002	0.4447
	Other			13.71	0.19	0.05	0.002	1.39	0.33	0.0006	0.4
	Total			124.31	1.4474	0.1297	<0.001	1.78	0.8573	0.05	0.8737
Tromsø	MT	1		4.7256	0.02352	0.01082	0.0433	0.07678	0.06001	0.217	0.2079
	HT			14.437	0.012553	0.003304	<0.001	0.001802	0.018324	0.92274	0.4451
	SQT			0.0948	-0.0452	0.1468	0.7617	2.8645	0.8143	0.00246	0.005239
	GLV		18	27.06	0.72	0.14	<0.001	-0.46	0.76	0.56	0.58
	Benzenoids			3.05	0.12	0.07	0.1	0.07	0.37	0.86	0.1
	Other			1.29	0.05	0.05	0.27	0.96	0.27	0.0234	0.02
	Total			10.28	0.88	0.27	0.005	3.51	1.52	0.03	0.33

## Sheet: Table S6
Table S6 Summary of linear model results for most abundant BVOCs in each compound group for each of the experiments. Compound groups: MT-monoterpenes; HT-homoterpenes; SQT - sesquiterpenes; GLV- green leaf volatiles; Benzenoids; Other. Log(x+1) transformation was applied to all VOC data to adjust for the rightward skew prior to linear mixed-effects model analyses. Block was treated as random fact…
						Slope			Intercept
Experiment	Compound group	Most abundant comound	df1	df2	F	Estimate	SE	P	Estimate	SE	P	r2
Abisko-1	MT	Linalool*	1	18	5.6281	0.011376	0.004795	0.029	0.02452	0.021178	0.262	0.2382
	HT	(E)-4,8-Dimethylnona-1,3,7-triene			4.041	0.008633	0.004295	0.0596	0.022956	0.018968	0.2418	0.1833
	SQT	(Z)-β-Farnesene*			0.2959	0.0009872	0.0018147	0.5931	0.0208195	0.0080149	0.0182	0.01618
	GLV	(E)-2-Hexenal*			19.49	0.20201	0.04576	0.000334	-0.0606	0.2021	0.767735	0.5199
	Benzenoids	Benzaldehyde*			0.8285	0.003928	0.004316	0.374737	0.088871	0.01906	0.000194	0.044
	Other	Tetracosane			1.3775	0.01318	0.01123	0.2558	0.10845	0.04959	0.0422	0.07109
Abisko-2	MT	(E)-β-Ocimene*	1	18	40.821	0.29026	0.04543	5.13e-06	-0.27057	0.30022	0.379	0.694
	HT	(E)-4,8-Dimethylnona-1,3,7-triene			316.5	0.063389	0.003563	7.19e-13	0.002009	0.023546	0.933	0.9462
	SQT	(Z)-β-Farnesene*			0.7847	0.004206	0.004748	0.3874	0.092224	0.031376	0.00877	0.04177
	GLV	(E)-2-Hexenal*			17.937	0.21966	0.05187	0.000498	-0.27905	0.34275	0.426188	0.4991
	Benzenoids	Methyl salicylate*			0.6081	0.004996	0.006406	0.4456	0.108869	0.042335	0.0192	0.03268
	Other	Decanal			2.32	0.03	0.02	0.15	0.21	0.12	0.1	0.06
Tromsø	MT	Linalool*	1	18	5.1947	0.008314	0.003648	0.0351	0.022014	0.020233	0.2909	0.224
	HT	(E)-4,8-Dimethylnona-1,3,7-triene			14.437	0.012553	0.003304	0.00131	0.001802	0.018324	0.92274	0.4451
	SQT	(E)-β-Caryophyllene*			0.008	-0.007613	0.085033	0.92965	1.45593	0.471633	0.00636	0.0004451
	GLV	(E)-2-Hexenal*			31.71	0.29346	0.05211	2.42e-05	-0.27402	0.28904	0.356	0.6379
	Benzenoids	Phenylmaleic anhydride			3.133	0.04957	0.02801	0.0937	-0.02411	0.15534	0.8784	0.1483
	Other	Decanal			0.0027	0.000921	0.017762	0.9592	0.207104	0.098516	0.0499	-0.05

## Sheet: Table S7
Table S7 Results of Random Forest analysis for separating between low and high herbivory: variable importance (E) for Abisko-1 experiment. Significance tested using t-test. BVOCs identified with standards are marked with *, the rest are identified with NIST 14 library. Higher positive E value indicate compounds that more strongly contributed to a correct assignment to predefined groups.
Compund	E	P
1-(Dimethylamino)-2-propanone	109.05	0.0006597
(E,E)-2,4-Hexadienal	96.0288	0.0006281
Butyrolactone	74.7103	0.007189
Aromandendrene	69.087	0.01134
N-Butyl-benzenesulfonamide	67.2607	0.005515
β-Copaene	66.7675	0.2739
(E)-2-Hexenal*	63.9241	0.0007025
Phenol	51.9392	0.00315
1-Octene*	48.6862	0.002362
Undecanal	48.4163	0
5-Ethyl-2(5H)-furanone	34.8824	0.004737
4,8,8-Trimethyl-2-methylene-bicyclo[5.2.0]nonane	31.6257	0.16
Methyl 2-methylbutyrate	31.3318	0.001519
α-Methylstyrene	31.0651	0.01388
Benzaldehyde*	31.0559	0.005098
(Z)-β-Farnesene*	30.2828	0.07675
(E)-4,8-Dimethylnona-1,3,7-triene	26.8631	0.155
Octanal*	25.6012	0.008393
Heptanal	24.8676	0.01176
Methyl butyrate	24.2243	0.02295
Tetracosane	17.1756	0.27
2-Phenoxy-ethanol	13.9318	0.05491
3-Hexenal	11.8641	0.03491
4-Methyl-1,3-pentadiene	10.8953	0.3068
Linalool*	9.26087	0.4972
Hexanal*	8.99852	0.5077
Acetophenone	8.4327	0.01688
α-Pinene*	8.33236	0.5832
Phenylmaleic anhydride	7.88943	0.157
2-Phenylbutenolide	7.78606	0.07839
3-Methylhexane	6.16492	0.6236
Furfural*	5.83483	0.07505
Caryophyllene oxide	4.57395	0.1494
Nonanal*	4.21539	0.05397
Benzophenone	1.85006	0.05292
α-Bourbonene	1.49955	0.72
(E)-β-Ocimene*	-0.53012	0.8373
4a,5-Dimethyl-3-(prop-1-en-2-yl)-1,2,3,4,4a,5,6,7-octahydronaphthalen-1-ol	-0.541328	0.9792
2-Butanone	-1.25756	0.2067
1,2-Benzenedicarboxylic acid	-1.96817	0.02674
Toluene*	-2.12385	0.2967
Myrcene*	-3.80872	0.7243
α-Humulene*	-4.91303	0.2448
(E)-β-Caryophyllene*	-7.36405	0.6275
(Z)-3-Hexenol*	-8.15062	0.104
(Z)-3-Hexenyl acetate*	-8.33057	0.3792
(Z)-3-Hexenyl butyrate*	-8.95768	0.7769
(Z)-Hexenyl isovalerate	-12.8264	0.7659

## Sheet: Table S8
Table S8 Results of Random Forest analysis for separating between low and high herbivory: variable importance (E) for Abisko-2 experiment. Significance tested using t-test. BVOCs identified with standards are marked with *, the rest are identified with NIST 14 library. Higher positive E value indicate compounds more strongly contributed to a correct assignment to predefined groups.
Compound	E	P
Indole	95.2213	0.0008773
(1R,3E,7E,11R)-1,5,5,8-Tetramethyl-12-oxabicyclo[9.1.0]dodeca-3,7-diene	69.3388	0.0004892
Megastigma-4,6(E),8(E)-triene	61.0316	0.02272
Linalool*	56.5495	0.02142
Bicylo[4.1.0]heptane, 7-bicyclo[4.1.0]hept-7-ylidene-	41.9852	0.0005698
Heptane	37.9826	0.0198
Caryophyllene oxide	37.88	0.005032
2-Methoxytoluene	37.8743	0.03016
(E)-4,4-Dimethyl-2-pentene	36.9199	0.03678
(E)-β-Ocimene*	36.7858	0.01969
(E)-4-Oxohex-2-enal	36.3485	0.2148
Benzyl nitrile	28.0052	0.005389
N-Butyl-benzenesulfonamide	25.9445	0.005464
(Z)-3-Hexenol*	25.053	0.02518
β-Copaene	21.7179	0.08175
α-Bourbonene	20.4245	0.03293
Eucalyptol*	20.2143	0.2561
(Z,Z)-2,4-Hexadiene	20.1921	0.005584
(E)-4,8-Dimethylnona-1,3,7-triene	18.0819	0.002936
2-Cyclopropylidene-1,7,7-trimethylbicyclo[2.2.1]heptane	17.8136	0.004929
2-Methyl-furan*	17.7266	0.06902
2-Methyl-butane	17.2903	0.002411
(E)-2-Hexenal*	16.5687	0.1105
α-Cubebene	16.3962	0.1023
3-Pentanone	16.0825	0.125
Benzaldehyde dimethyl acetal	16.0202	0.1008
α-Cadinene	13.6249	0.0312
Hexacosane	13.4014	0.0269
2-Butanone	12.7963	0.02
1,3-Pentadiene	12.5355	0.03974
Benzonitrile	12.315	0.1111
11,11-Dimethyl-spiro[2,9]dodeca-3,7-dien	12.0449	0.007678
(E)-2-Pentenal	10.2963	0.09151
(Z)-3-Hexenyl butyrate*	9.65754	0.08731
(Z)-Linalool oxide	8.03678	0.1007
(Z)-3-Hexenyl benzoate	6.13272	0.6932
2,2-Dihydroxy-1-phenylethanone	5.46903	0.01433
(Z)-3-Hexenyl acetate*	4.45397	0.05841
1,8-Cyclopentadecadiyne	4.06636	0.01361
Toluene*	3.61761	0.13
3,3-Dimethyl-pentane	3.42268	0.02999
Hexanal	3.42107	0.2024
α-Muurolene	3.22948	0.01687
Hexadecane	3.11688	0.09887
Methyl isobutyl ketone	3.06617	0.08
1R,3Z,9s-4,11,11-Trimethyl-8-methylenebicyclo[7.2.0]undec-3-ene	3.00353	0.2374
(E,E)-2,4-Hexadienal	2.70917	0.13
(Z)-2-Hexenol	2.21861	0.09302
Tetrahydro-2-pyranone	1.89807	0.06132
Hexyl acetate	1.65269	0.2553
2,4,4-Trimethyl-1-pentene	1.26295	0.18
Methyl benzoate	-0.0597767	0.08881
Cyclohexane, 2-ethenyl-1,1-dimethyl-3-	-0.181706	0.1095
Germacene D	-0.375443	0.6205
Benzophenone	-1.06995	0.01159
α-Copaene	-1.24013	0.09649
1,3-Dimethyl-benzene	-1.82917	0.1241
α-Humulene*	-1.85207	0.15
Unidentified GLV	-1.86659	0.18
Myrcene*	-2.02153	0.6458
Acetophenone	-2.02325	0.0202
Benzene	-2.17189	0.62
1-Octene*	-2.35709	0.46
p-Cymenene	-2.36218	0.6355
Unidentified monoterpene	-2.70722	0.9435
Nonanal*	-2.86297	0.7367
Phenylmaleic anhydride	-3.22164	0.01778
p-Cymene*	-3.61923	0.3196
Methyl salicylate*	-3.90621	0.0229
6-Methyl-5-hepten-2-one	-4.33925	0.4856
1,6,6-Trimethyl-cyclohexene	-4.41906	0.06
3-Methoxyacetophenone	-4.64523	0.3372
Furfural*	-4.7999	0.75
4-Methyl-2-methylene-1-(1methylethylidene)-cyclohexane	-5.05495	0.83
Decanal	-5.07986	0.34
4-Hydroxybutanoic acid	-5.15865	0.96
(Z)-Ocimene	-5.31963	0.168
3-Hexenal	-5.34214	0.3759
(Z)-Geranylacetone	-5.38424	0.508
Terpinolene*	-5.5284	0.9267
3,3,5-Trimethyl-cyclohexene	-5.56544	0.12
Limonene*	-6.14239	0.9403
(Z)-2-Hexenyl acetate	-6.58412	0.3718
α-Pinene*	-6.69435	0.805
α-Farnesene	-7.05165	0.5037
p-Xylene*	-7.24521	0.39
Undecanal	-7.50529	0.8702
(Z)-β-Farnesene*	-8.1413	0.1629
(E)-β-Caryophyllene*	-9.1105	0.4914

## Sheet: Table S9
Table S9 Results of Random Forest analysis for separating between low and high herbivory: variable importance (E) for Tromsø experiment. Significance tested using t-test. BVOCs identified with standards are marked with *, the rest are identified with NIST 14 library. Higher positive E value indicate compounds more strongly contributed to a correct assignment to predefined groups.
Compound	E	P
3-Hexenal	110.964	0.01491
(E)-2-Hexenal*	73.1641	0.0002726
(Z)-2-Hexenyl butyrate	65.8346	0.006451
(Z)-3-Hexenol*	60.6925	0.0001408
(Z)-2-Hexenol	50.556	0.002602
Hexanal	49.919	0.0006763
(Z)-3-Hexenyl butyrate*	44.861	0.07523
Cyclobutane	40.164	0.07436
2-Methyl-1-butanol	38.252	0.09
Cadine-1,4-diene	37.5708	0.003194
(Z)-2-Hexenyl acetate	34.6863	0.07125
2-methyl-Furan*	28.4812	0.009836
(E)-β-Ocimene*	24.6998	0.7432
Cyclohexylbenzene	23.1151	0.02941
Indole	22.9038	0.07086
(E,E)-2,4-Hexadienal	21.3816	0.07622
β-copaene	18.575	0.07
Ethylidenecyclopropane	18.5747	0.104
(Z)-3-Hexenyl acetate*	17.4619	0.01235
α-Copaene	15.4206	0.01578
1,3-Dimethyl-benzene	14.7083	0.05
3-Pentanone	12.9598	0.5
(E)-2-Penten-1-ol	11.1061	0.9047
β-Methoxy-(S)-2-furanethanol	10.9935	0.1174
Aciphyllene	10.1624	0.02647
Methyl isobutyl ketone	10.1209	0.8
(E)-4,8-Dimethylnona-1,3,7-triene	9.92307	0.02147
1-Hexanol	9.43961	0.01406
Megastigma-4,6(E),8(E)-triene	8.72073	0.08705
2-Cyclopropylidene-1,7,7-trimethylbicyclo[2.2.1]heptane	7.98386	0.08568
Toluene*	7.16065	0.1339
1-Penten-3-one	6.03758	0.4
4,8,8-Trimethyl-2-methylene-bicyclo[5.2.0]nonane	6.02665	0.08104
Benzaldehyde*	5.76101	0.3135
2,3-Dihydro-4-methylfuran	5.58812	0.88
(E)-2-Pentenal	5.36234	0.49
Propylene oxide	4.88676	0.1704
α-Methylstyrene	4.85351	0.6059
Hexyl acetate	4.42769	0.1163
Maleic anhydride	4.34943	0.26
β-Selinene	3.99343	0.04769
Decanal	2.01368	0.9339
p-Benzoquinone	1.65164	0.2936
(Z)-3-Hexenyl 2-methylbutanoate	1.45024	0.08616
Chamigrene	1.20387	0.1235
Nonanal*	1.11644	0.8779
1-Nonene	0.71796	0.13
Methyl butyrate	0.396801	0.6081
Khusimyl methyl ether	0.327222	0.05981
Aromandendrene*	-0.470787	0.1261
1-Octene*	-0.497389	0.0814
1,1-Dimethyl-3-methylene-2-vinylcyclohexane	-0.758038	0.05361
Octanal*	-0.795923	0.8101
α-Bourbonene	-1.09317	0.1303
(E)-β-Caryophyllene*	-1.65601	0.1488
(E)-2-Methyl-1,3-pentadiene	-1.66789	0.8566
Phenol	-1.67742	0.5447
2-ethyl-furan	-2.03521	0.7862
α-Humulene*	-2.12045	0.1354
1R,3Z,9s-4,11,11-Trimethyl-8-methylenebicyclo[7.2.0]undec-3-ene	-2.87544	0.09159
p-Xylene*	-3.50509	0.44
Benzofuran	-4.38059	0.8592
2-Butanone	-5.37074	0.688
Benzophenone	-5.47531	0.8924
Acetophenone	-5.54608	0.7439
Benzene	-5.58614	0.1801
Eudesma-1,4(15),11-triene	-5.73976	0.1107
Furfural*	-6.08449	0.2347
Phenylmaleic anhydride	-6.14645	0.745
Caryophyllene oxide	-6.21755	0.2943
1,2-Benzenedicarboxylic acid	-6.42349	0.6108
Isocaryophyllene	-6.53838	0.1338
4-Phenyl-4-cyclopentene-1,3-dione	-7.00297	0.8738
Isovalencenol	-7.23456	0.1993
β-Cubebene	-7.60813	0.5788
Methyl propionate	-8.05991	0.8412
6-Methyl-5-hepten-2-one	-8.57966	0.6806
1,8-Cyclopentadecadiyne	-8.80344	0.08667
α-Longipinene	-8.8926	0.2342
α-Pinene*	-9.18989	0.8506
(1R,7S,E)-7-Isopropyl-4,10-dimethylenecyclodec-5-enol	-9.6455	0.2267
Methyl salicylate*	-9.95539	0.6945
Benzaldehyde dimethyl acetal	-10.3972	0.3361
β-Pinene	-12.1085	0.2266
Linalool*	-12.3796	0.9762
